# Supplementary material
Source: PubMed Central journal article supplement (PMC4136727)
Supplement: jm5008352_si_001.pdf [file jm5008352_si_001.pdf]

## Supporting Information

# Allosteric Modulation of HIV-1 Protease via Targeting the Flap-Tip Recognition Site

Peter M.-U. Ung,<sup>1</sup> James B. Dunbar, Jr.,<sup>1</sup> Jason E. Gestwicki,<sup>2</sup> and Heather A. Carlson<sup>1\*</sup>

<sup>1</sup>Department of Medicinal Chemistry, College of Pharmacy, University of Michigan, 428 Church Street, Ann Arbor, MI 48109-1065, United States

<sup>2</sup>Department of Pathology and the Life Sciences Institute, University of Michigan, 210 Washtenaw Avenue, Ann Arbor, MI 48109-2216, United States

**Table S1.** Anti-protease activity of Markush compounds

| ID         | Activity (%) | MW  | ID                     | Activity (%) | MW  |
|------------|--------------|-----|------------------------|--------------|-----|
| CB 5202063 | 80 ± 5       | 367 | CB 9058855             | 68 ± 6       | 328 |
| CB 5228968 | --           | 306 | CB 9112729             | 65 ± 7       | 324 |
| CB 5343019 | --           | 329 | CB 9118639             | 72 ± 9       | 333 |
| CB 5373492 | 65 ± 2       | 286 | CB 9123846             | 79 ± 12      | 338 |
| CB 5482954 | --           | 352 | CB 9154080             | --           | 325 |
| CB 5522020 | 88 ± 8       | 280 | CCG 18156 <sup>a</sup> | 52 ± 9       | 318 |
| CB 5566364 | 76 ± 5       | 296 | CCG 21102 <sup>a</sup> | 42 ± 4       | 340 |
| CB 5570164 | --           | 339 | CCG 24371 <sup>a</sup> | 65 ± 6       | 400 |
| CB 5660337 | 79 ± 2       | 310 | CCG 29660 <sup>a</sup> | 65 ± 8       | 439 |
| CB 5660491 | --           | 328 | CCG 30993 <sup>a</sup> | 62 ± 6       | 390 |
| CB 5738653 | 84 ± 5       | 244 | CD D071-0025           | 80 ± 7       | 343 |
| CB 5797113 | 77 ± 7       | 279 | CD D298-0425           | 82 ± 5       | 315 |
| CB 5979646 | 37 ± 6       | 357 | CD E245-0514           | 92 ± 5       | 336 |
| CB 7386606 | 79 ± 9       | 342 | CD E966-0066           | --           | 358 |
| CB 7910527 | 88 ± 4       | 317 | CD E977-0196           | 88 ± 5       | 334 |
| CB 7929697 | 71 ± 7       | 369 | CD G428-0017           | 81 ± 11      | 354 |
| CB 7932774 | 75 ± 4       | 325 | CD G645-0045           | 91 ± 14      | 284 |
| CB 7935081 | 64 ± 4       | 261 | CD G851-1179           | 93 ± 6       | 314 |
| CB 7936269 | 79 ± 10      | 256 | MB BTB 09244           | 95 ± 8       | 297 |
| CB 7936917 | 58 ± 5       | 282 | MB HTS 12769           | 92 ± 8       | 274 |
| CB 7937150 | 82 ± 7       | 328 | MB HTS 12771           | 84 ± 7       | 280 |
| CB 7940247 | 89 ± 5       | 299 | MB HTS 12793           | 89 ± 12      | 347 |
| CB 7989211 | 74 ± 6       | 304 | MB SEW 04939           | --           | 406 |
| CB 9022153 | 78 ± 10      | 331 |                        |              |     |
| CB 9058373 | --           | 240 |                        |              |     |

CB: ChemBridge; CD: ChemDiv; IB: IBScreen; MB: MayBridge

All compounds were tested at 150 μM

<sup>a</sup> Compound not purchasable from chemical vendors

|              | Run 1 | Run 2 | Run 3 | Run 4 | Run 5 | Average |
|--------------|-------|-------|-------|-------|-------|---------|
| Median (Å)   | 1.99  | 1.68  | 1.86  | 1.98  | 2.16  | 1.93    |
| St. Dev. (Å) | 0.40  | 0.30  | 0.20  | 0.28  | 0.43  | 0.32    |
| Maximum (Å)  | 3.52  | 2.85  | 2.65  | 2.72  | 4.05  | 3.16    |
| Minimum (Å)  | 1.09  | 1.25  | 1.32  | 1.12  | 1.17  | 1.19    |

|              | Run 1 | Run 2 | Run 3 | Run 4 | Run 5 | Average |
|--------------|-------|-------|-------|-------|-------|---------|
| Median (Å)   | 5.2   | 7.7   | 4.7   | 5.2   | 2.5   | 5.1     |
| St. Dev. (Å) | 2.4   | 1.3   | 1.4   | 2.4   | 0.7   | 1.6     |

|        | Run 1 | Run 2 | Run 3 | Run 4 | Run 5 | Average |
|--------|-------|-------|-------|-------|-------|---------|
| 2.5 %  | 1.3   | 3.8   | 2.0   | 1.2   | 1.2   | 1.9     |
| 25 %   | 3.4   | 7.2   | 3.8   | 3.3   | 2.1   | 3.9     |
| 50 %   | 5.2   | 7.7   | 4.7   | 5.2   | 2.5   | 5.1     |
| 75 %   | 6.5   | 8.2   | 5.8   | 7.1   | 2.9   | 6.1     |
| 97.5 % | 10.2  | 9.7   | 7.4   | 9.9   | 4.2   | 8.3     |

|              | Run 1 | Run 2 | Run 3 | Run 4 | Run 5 | Average |
|--------------|-------|-------|-------|-------|-------|---------|
| Median (Å)   | 2.84  | 2.53  | 2.54  | 3.27  | 2.44  | 2.72    |
| St. Dev. (Å) | 0.45  | 0.64  | 0.45  | 0.57  | 0.46  | 0.51    |
| Maximum (Å)  | 4.07  | 5.13  | 4.04  | 4.74  | 4.06  | 4.41    |
| Minimum (Å)  | 1.47  | 1.36  | 1.41  | 1.60  | 1.30  | 1.43    |

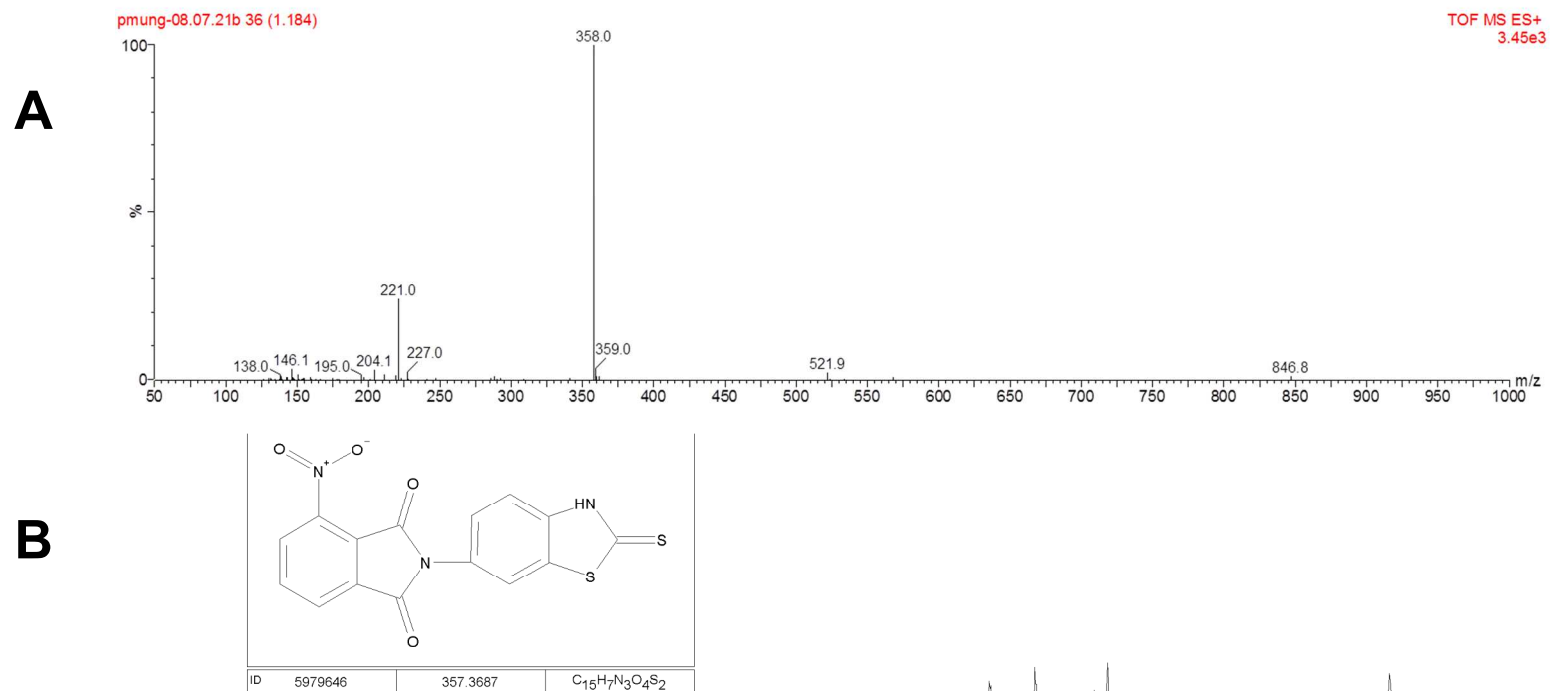

**Figure S1.** Identity of ChemBridge 5979646 (NIT):  
**(A)** time-of-flight MS data and **(B)** <sup>1</sup>H NMR spectrum.

doublet of doublet: 7.415, 7.445 ppm @ J = 0.02ppm (2)  
 singlet: 7.72 ppm (1)  
 triplet: 8.13 ppm @ J = 0.02ppm (1)  
 doublet: 8.24 ppm @ J = 0.02ppm (1)  
 doublet: 8.31 ppm @ J = 0.02ppm (1)  
 singlet: 13.90 ppm (1)

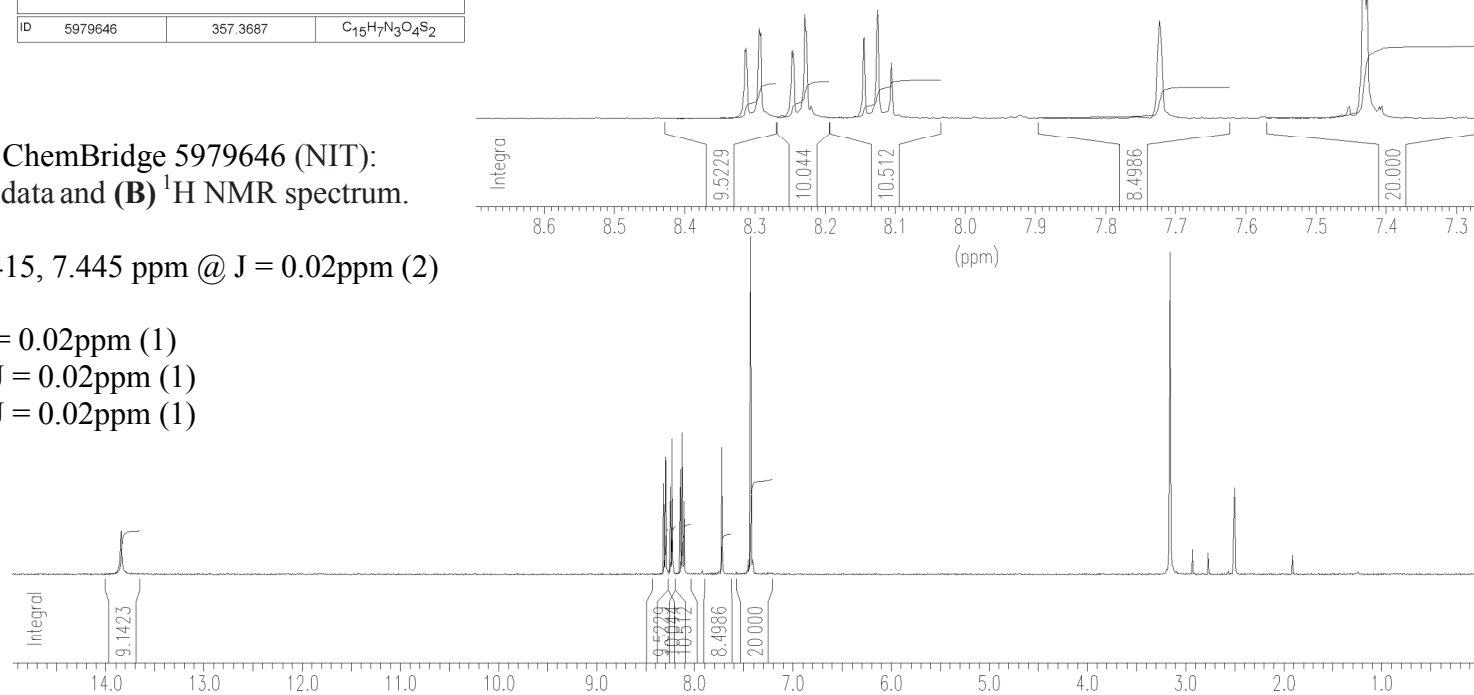

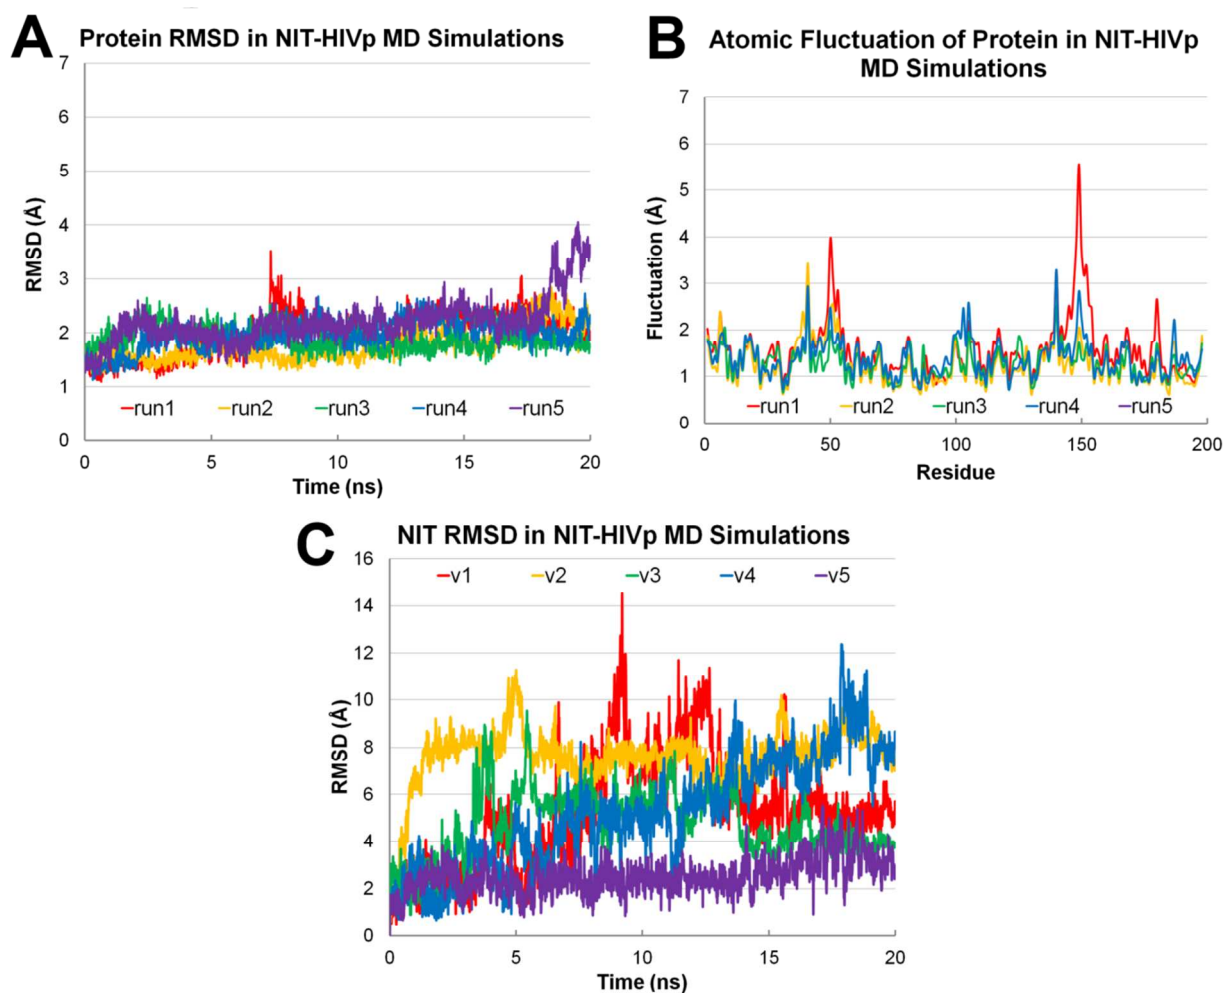

**Figure S2.** (A) RMS distance of the HIV-1p in five independent NIT-protease MD simulations throughout the production runs. The median RMSD of all five trajectories is 1.96 Å, with standard deviation of 0.32 Å and variance of 0.11 Å. (B) Atomic fluctuations by residue of NIT-protease MD simulations. The maximum fluctuations occur at the flap region (Ile47 – Phe53) on both monomers with the maximum fluctuation (> 2.0 Å) centered at residue Ile50. (C) RMS distance of the ligand NIT in the MD simulations.

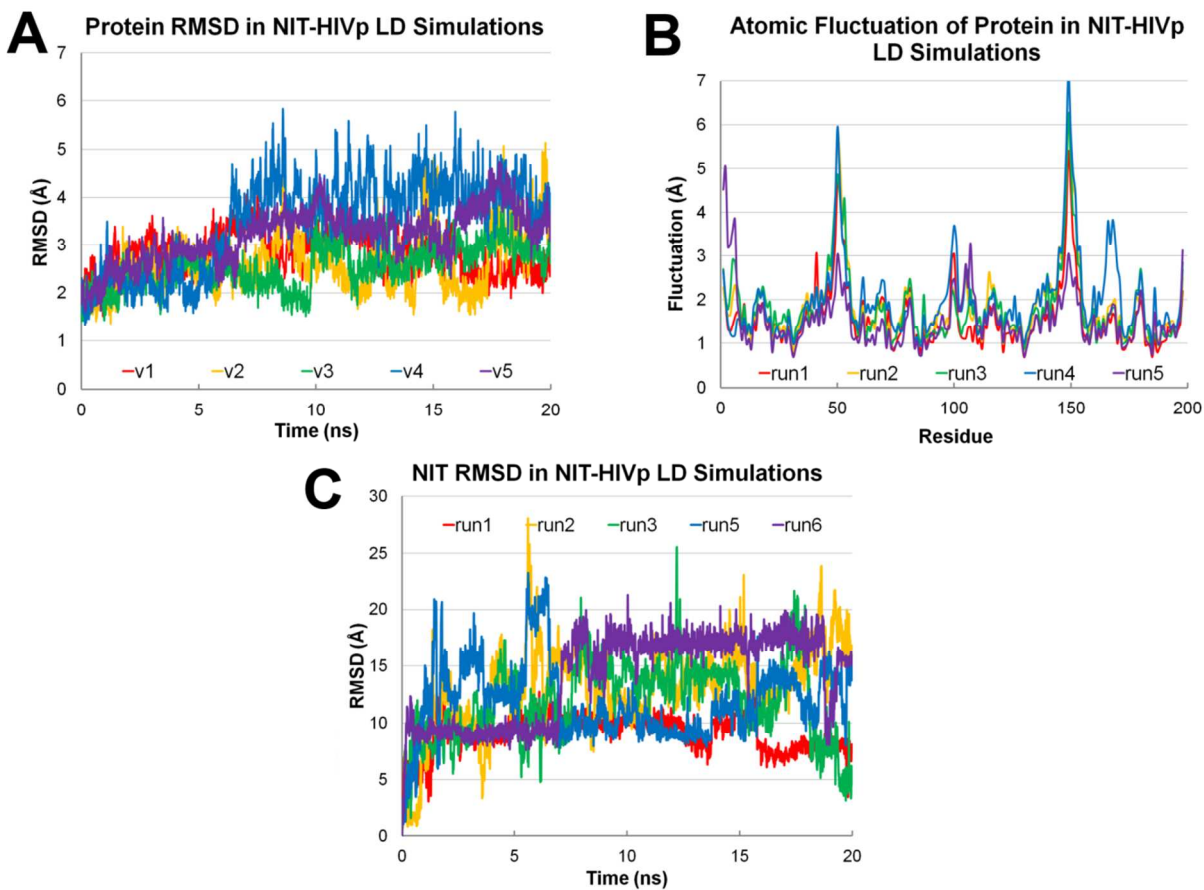

**Figure S3.** (A) Root-mean-square distance of five independent NIT-protein LD simulations throughout the production runs. The median RMSD of all five trajectories is 2.72 Å, with standard deviation of 0.51 Å and variance of 0.27 Å. (B) Atomic fluctuations by residue of five independent NIT-protease LD simulations. The maximum fluctuations occur at the flap region (Ile47 – Phe53) on both monomers with the maximum fluctuation (> 5.0 Å) centered at residue Ile50. (C) RMS distance of the ligand NIT in the LD simulations.
